# Supplementary material
Source: publisher figshare collection journal article supplement (https://frontiersin.figshare.com/ndownloader/files/28382355)
Supplement: Supplementary file 3 [file 28382355]

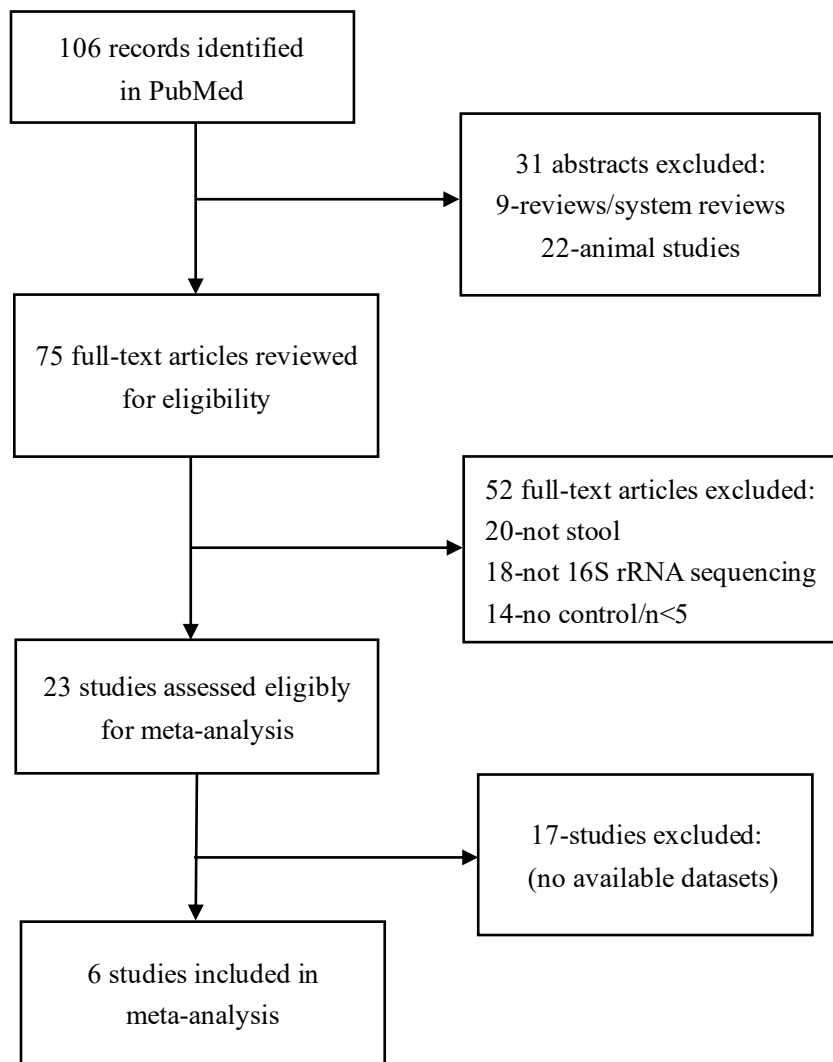

**Figure. S1** The flow diagram depicts our search results and selection of included studies in this meta-analysis.
