# Supplementary material
Source: publisher figshare collection journal article supplement (https://frontiersin.figshare.com/ndownloader/files/28382355)
Supplement: Supplementary file 4 [file 28382355]

Table S2

| Bray-curtis-distance-matrix |         |          |
|-----------------------------|---------|----------|
| Study                       | P-value | Q-value  |
| Zhuang_2018                 | 0.67    | 0.67     |
| Zhu_2019                    | 0.001   | 0.001 ** |
| Presti_2019                 | 0.331   | 0.343    |
| Pozuelo_2015                | 0.001   | 0.001 ** |
| Saulnier_2011               | 0.054   | 0.054    |
| Labus_2017                  | 0.946   | 0.946    |

\*Q < 0.05 was considered statistically significant.
