# Supplementary material
Source: publisher figshare collection journal article supplement (https://frontiersin.figshare.com/ndownloader/files/28382355)

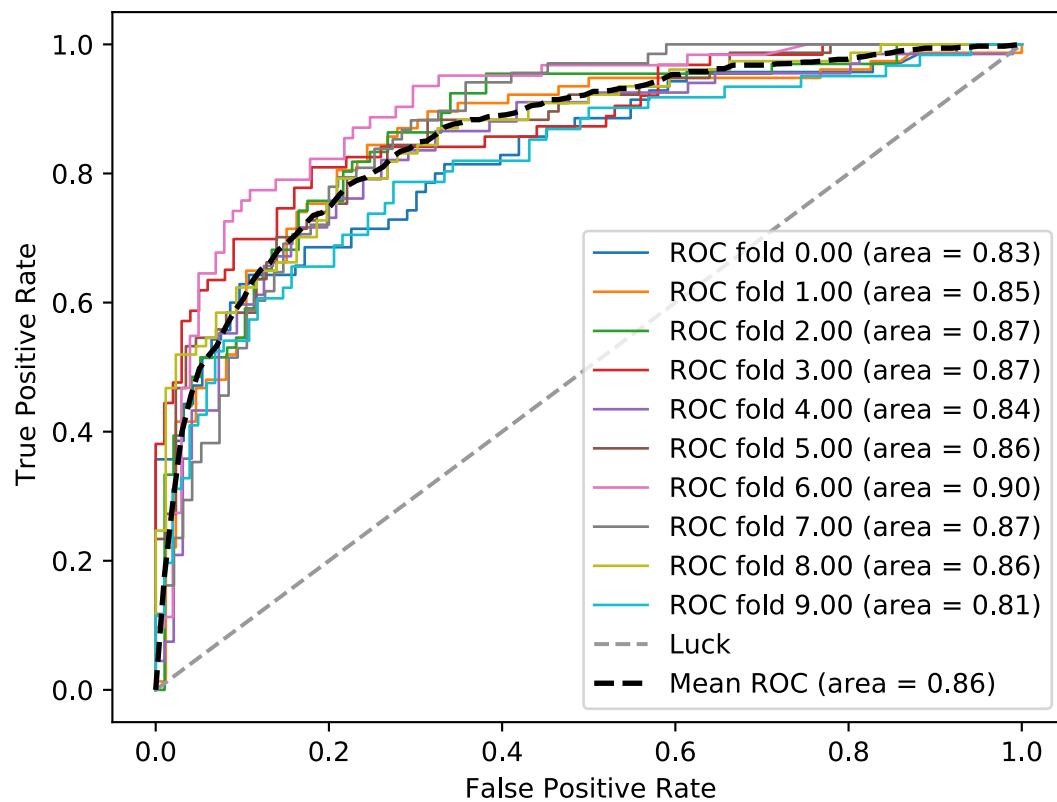

Supplement: Supplementary file 1 [file 28382355]

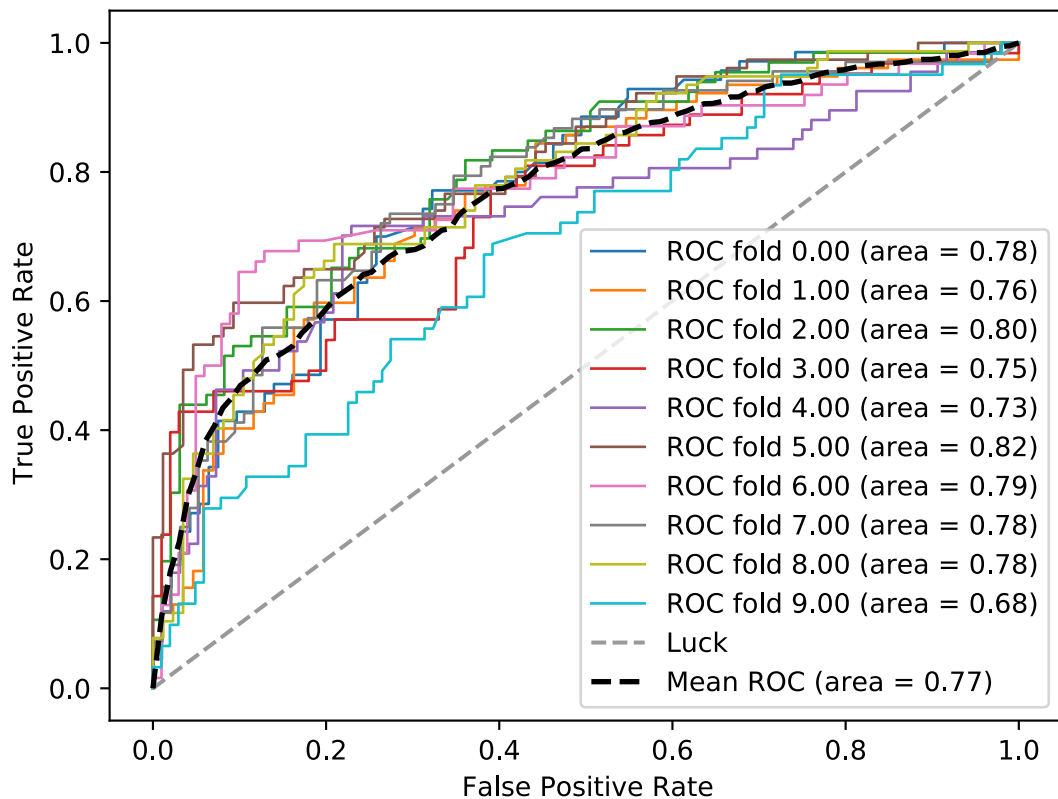

Supplement: Supplementary file 2 [file 28382355]
